# Supplementary material for: Enhancing P3HT/PCBM blend stability by thermal crosslinking using poly(3-hexylthiophene)-S,S-dioxide
Source: Royal Society of Chemistry journal article supplement (doi:10.1039/d0tc00109k), 2020-01-01
Supplement: d0tc00109k1.pdf [file d0tc00109k1.pdf]

## Electronic Supplementary Information

### Enhancing P3HT/PCBM blend stability by thermal crosslinking using poly(3-hexylthiophene)-S,S-dioxide

M. Milanovich<sup>a</sup>, T. Sarkar<sup>b</sup>, Y. Popowski<sup>a</sup>, J. Z. Low<sup>c</sup>, L. M. Campos<sup>c</sup>, S. Kenig<sup>a</sup>, G. L. Frey<sup>b</sup> and E. Amir<sup>a†</sup>

a. Shenkar College of Engineering, Design and Art, Faculty of Engineering and Design, Department of Polymers and Plastics Engineering, Ramat Gan 5252626, Israel.

b. Department of Materials Science & Engineering, Technion – Israel Institute of Technology, Haifa, Israel.

c. Department of Chemistry, Columbia University, New York, USA.

† Correspondence to: E. Amir, Department of Polymers and Plastics Engineering, Shenkar College, Ramat Gan 5252626, Israel. E-mail: eamir@shenkar.ac.il

#### 1. X-Ray Photoelectron Spectroscopy (XPS)

Low-resolution XPS analysis of P3HT-TDO shows significant presence of oxygen, in comparison with P3HT, due to oxidation of sulfur atoms.

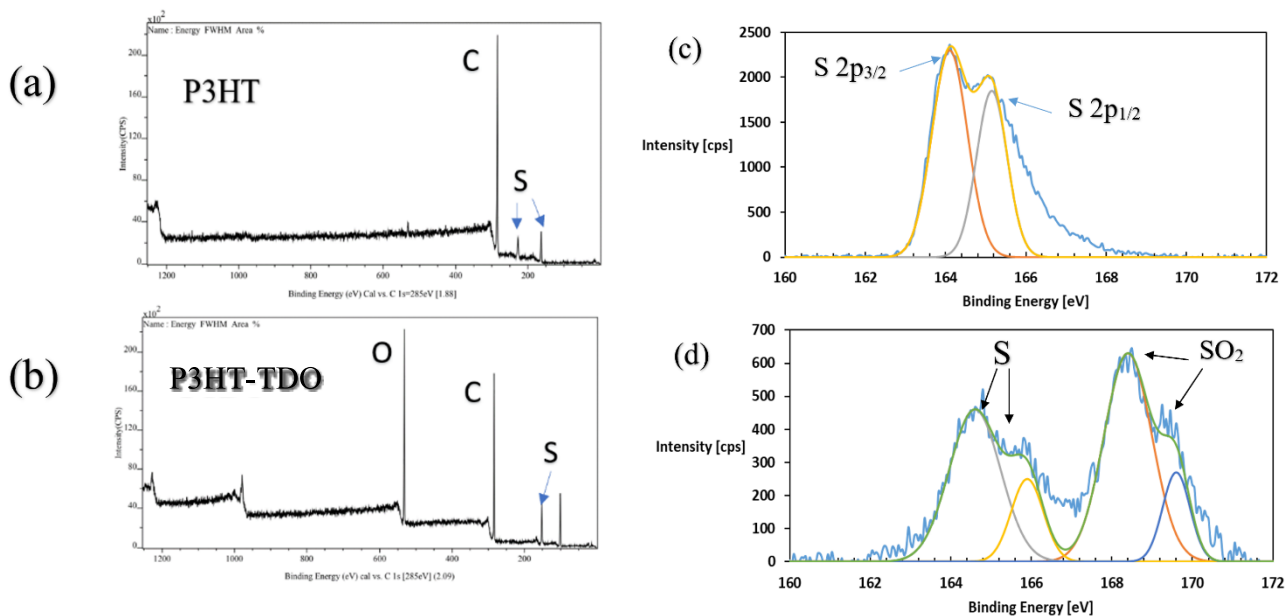

Figure S1 - (a) Low resolution XPS analysis of P3HT (b) Low resolution XPS analysis of P3HT-TDO (c) XPS analysis deconvolution of S 2p signal in P3HT (d) XPS analysis deconvolution of S 2p signal in P3HT-TDO.

Further XPS analysis was conducted in order to generate atomic compositions of SO<sub>2</sub>/S, S/C, and SO<sub>2</sub>/C for P3HT-TDO thin films, before and after annealing for 20 min at 150 °C.

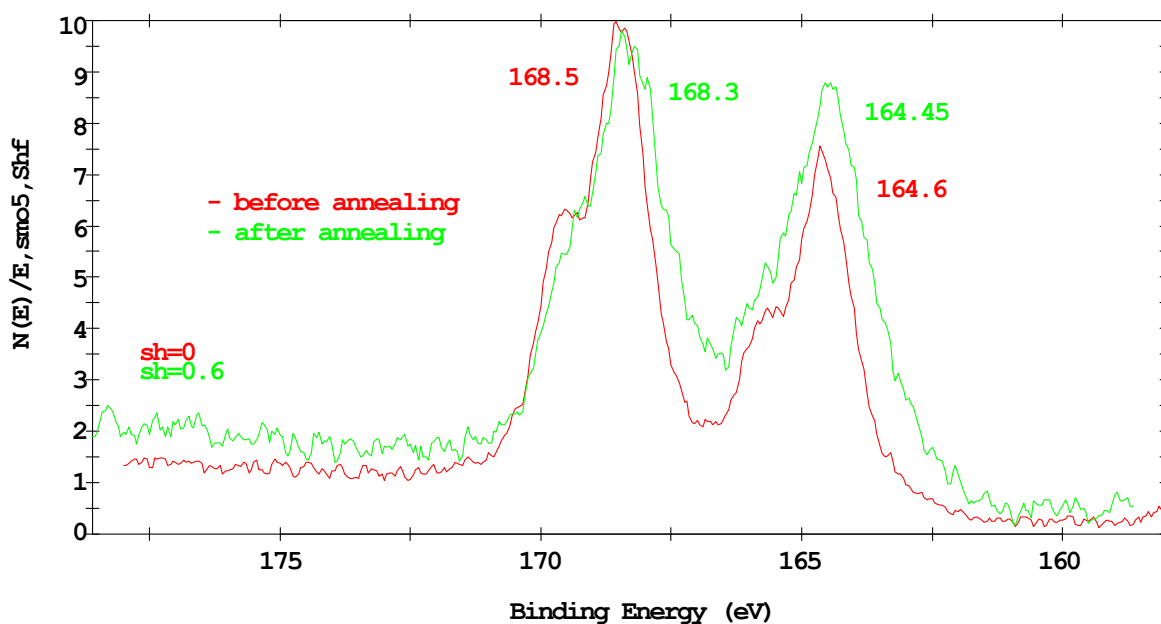

Figure S2 - Low resolution XPS analysis of P3HT-TDO S 2p signal before and after annealing for 20 min at 150 °C.

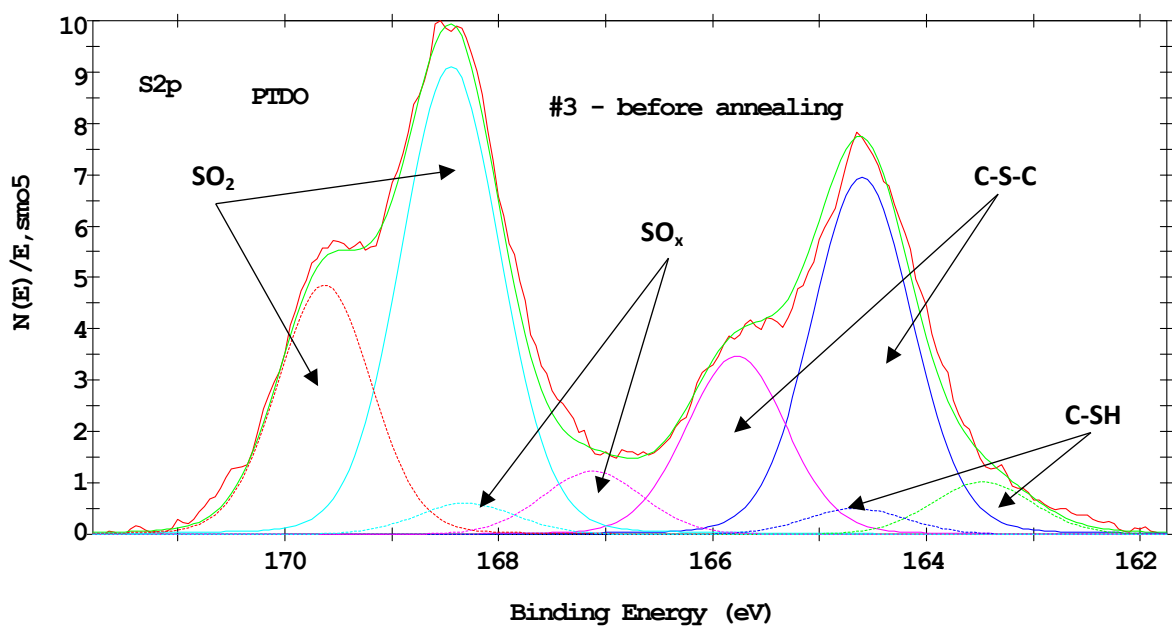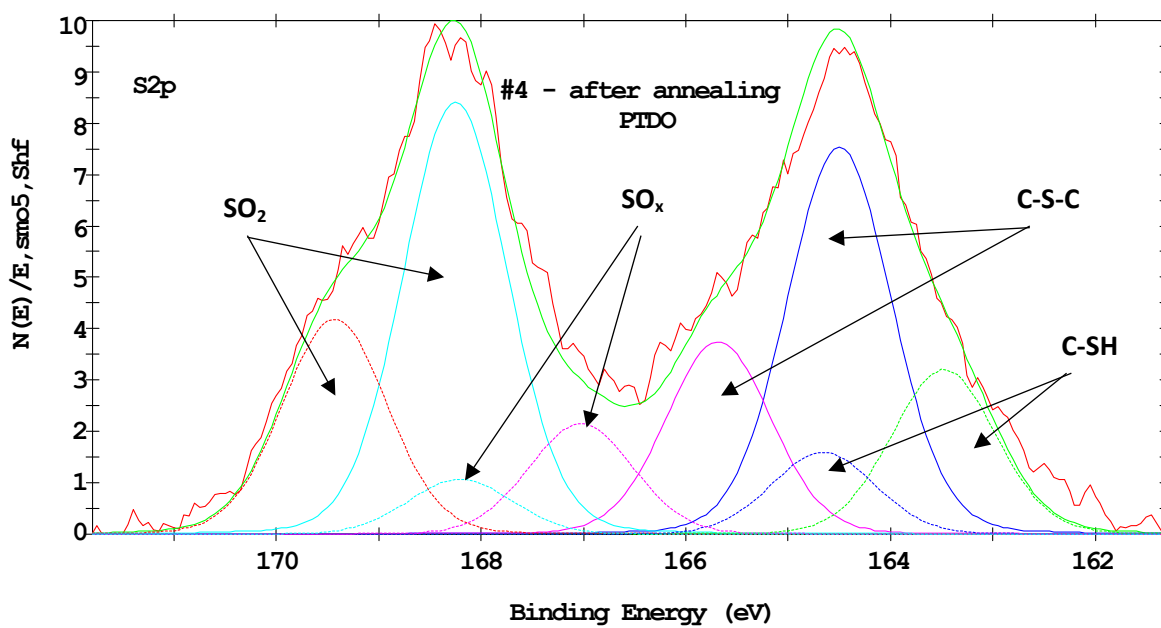

Figure S3 - XPS analysis deconvolution of S 2p signal in P3HT-TDO (a) before and (b) after annealing for 20 min at 150 °C.

Following component bonds were determined from high-resolution XPS analysis of sulfur:

|                 |                       | <b>C-SH</b>               | <b>C-S-C</b> | <b>SO<sub>x</sub></b>                | <b>SO<sub>2</sub></b> |
|-----------------|-----------------------|---------------------------|--------------|--------------------------------------|-----------------------|
| <b>P3HT-TDO</b> | <b>Before anneal.</b> | 5.53%                     | 38.02%       | 6.68%                                | 49.77%                |
|                 |                       | <b>Total C-S - 43.55%</b> |              | <b>Total SO<sub>x</sub> – 56.45%</b> |                       |
|                 | <b>After anneal.</b>  | 15.01%                    | 35.36%       | 10.01%                               | 39.54%                |
|                 |                       | <b>Total C-S - 50.37%</b> |              | <b>Total SO<sub>x</sub> – 49.55%</b> |                       |

Table S1 – Component bonds percentage in P3HT-TDO XPS analysis of S 2p signal before and after annealing for 20 min at 150 °C.

Following atomic compositions were determined from high-resolution XPS analysis of S/C for P3HT-TDO and P3HT/P3HT-TDO (1:1) thin films, before and after annealing for 20 min at 150 °C.

|          | <b>P3HT-TDO<br/>Before annealing</b> | <b>P3HT-TDO<br/>After annealing</b> |
|----------|--------------------------------------|-------------------------------------|
| <b>C</b> | <b>70.87 %</b>                       | <b>73.37 %</b>                      |
| <b>S</b> | <b>4.18 %</b>                        | <b>3.45 %</b>                       |

Table S2 – Atomic compositions percentage in P3HT-TDO XPS analysis before and after annealing for 20 min at 150 °C.

Summary of SO<sub>2</sub>/S, S/C, and SO<sub>2</sub>/C for P3HT-TDO thin film, before and after annealing for 20 min at 150 °C:

|                              | <b>P3HT-TDO</b><br><b>Before annealing</b> | <b>P3HT-TDO</b><br><b>After annealing</b> |
|------------------------------|--------------------------------------------|-------------------------------------------|
| <b>SO<sub>2</sub> : S</b>    | <b>1.30 : 1</b>                            | <b>0.98 : 1</b>                           |
| <b>C : SO<sub>2</sub></b>    | <b>30.03 : 1</b>                           | <b>42.91 : 1</b>                          |
| <b>C : S<sub>total</sub></b> | <b>17.95 : 1</b>                           | <b>21.27 : 1</b>                          |

Table S3 – Atomic compositions ratios in P3HT-TDO XPS analysis before and after annealing for 20 min at 150 °C.

## 2. Attenuated Total Reflectance

Oxidation of thiophene units was confirmed by ATR infrared analysis with peaks at  $1142\text{cm}^{-1}$  and  $1314\text{cm}^{-1}$  corresponding to symmetric and asymmetric stretching of  $\text{SO}_2$  accordingly (see Fig. 1). Additional groups appear at  $1714\text{ cm}^{-1}$  and  $1770\text{ cm}^{-1}$  which are probably the result of additional oxidation reactions of P3HT with mCPBA.

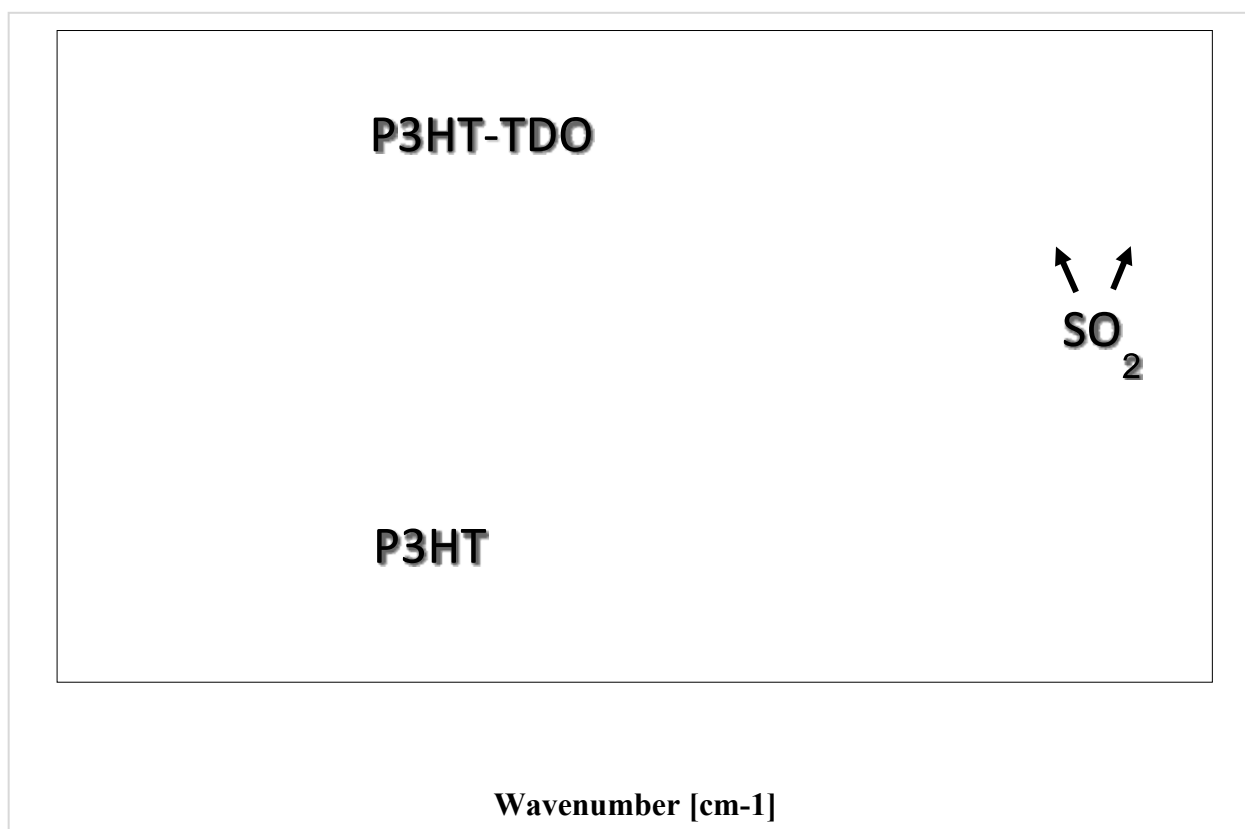

Figure S4 - FTIR spectrum of P3HT and P3HT-TDO.

### 3. $^1\text{H}$ -NMR Analysis

To analyze the structure of P3HT-TDO in more detailed manner,  $^1\text{H}$ -NMR analysis was performed. It can be seen that  $^1\text{H}$ -NMR spectrum of P3HT-TDO have several noticeable differences in comparison with P3HT. Aromatic protons at  $\delta$  6.98 ppm shifts to  $\delta$  7.35 ppm due to oxidation of the thiophene rings. Protons in  $\alpha$  position on alkyl chain display two signals –  $\delta$  2.76 ppm attributed to unoxidized thiophene rings and  $\delta$  2.95 ppm attributed to oxidized thiophene

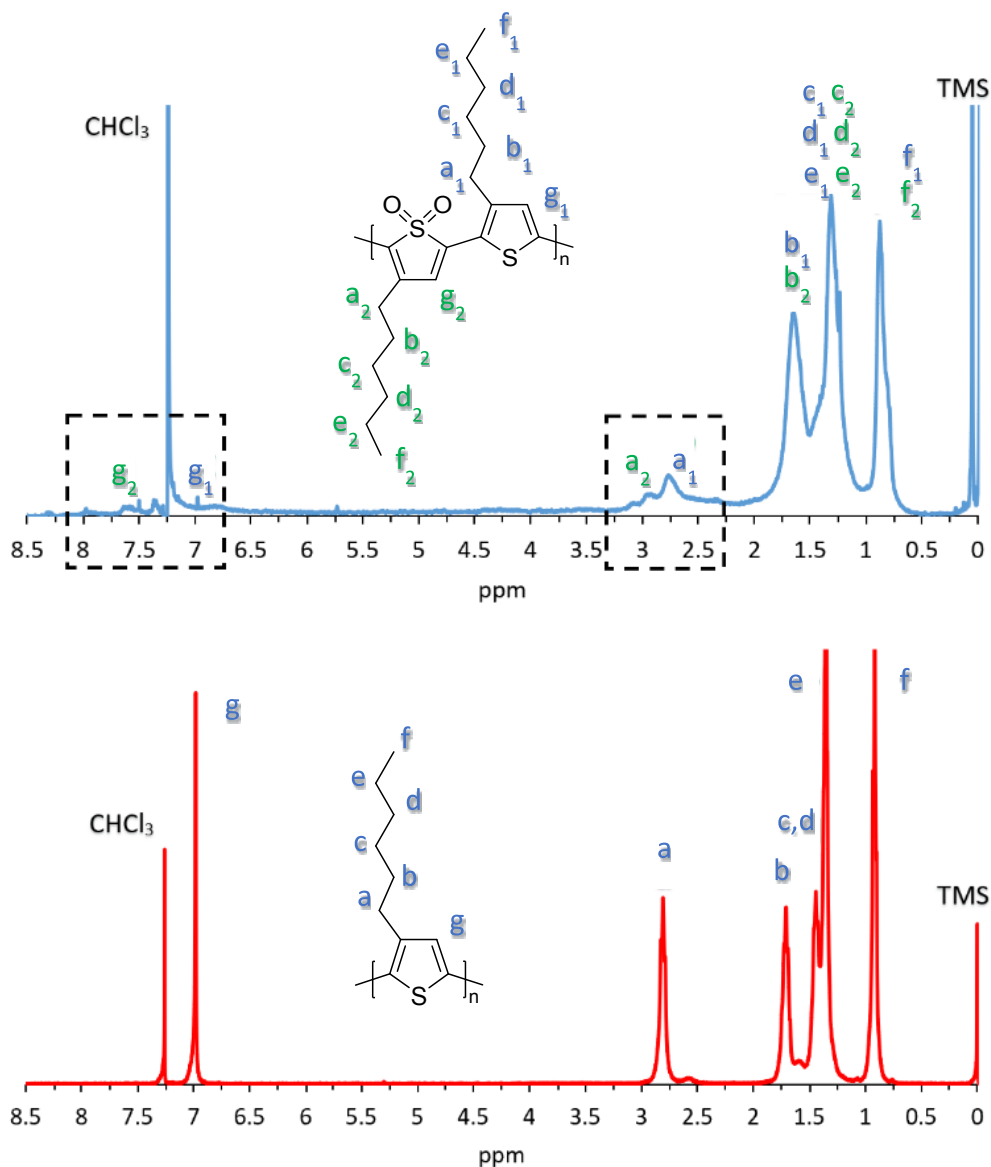

Figure S5 -  $^1\text{H}$ -NMR spectra of P3HT-TDO (a) and P3HT(b).

rings.

#### 4. DSC Analysis

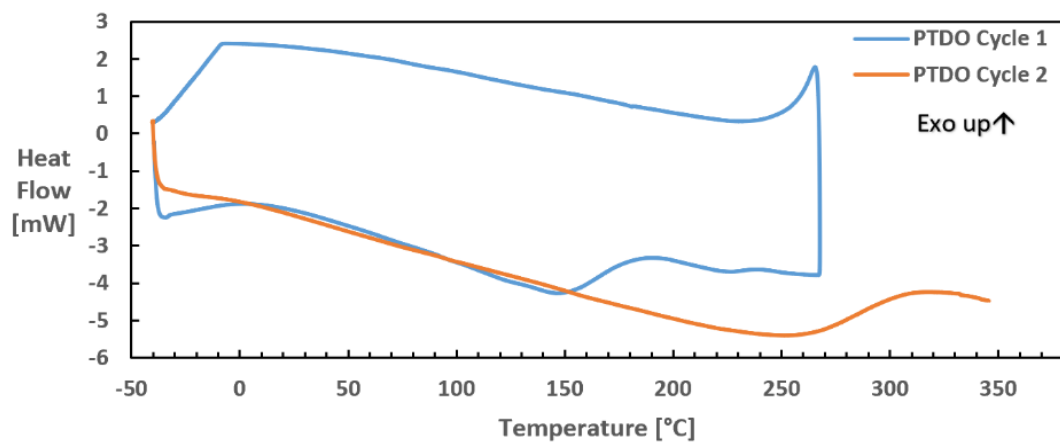

P3HT-TDO cycle 1

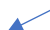

P3HT-TDO cycle 2

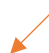

Figure S6 - DSC analysis of P3HT-TDO.



## 5. TGA-IR Analysis

FTIR analysis of gaseous products was performed on bulk P3HT-TDO via TGA-FTIR apparatus under air atmosphere. P3HT-TDO analysis shows presence of  $\text{CO}_2$ ,  $\text{SO}_2$  and gaseous polymer segments (Figure S3). Gaseous  $\text{SO}_2$  evolved in two stages, first stage related to cross-

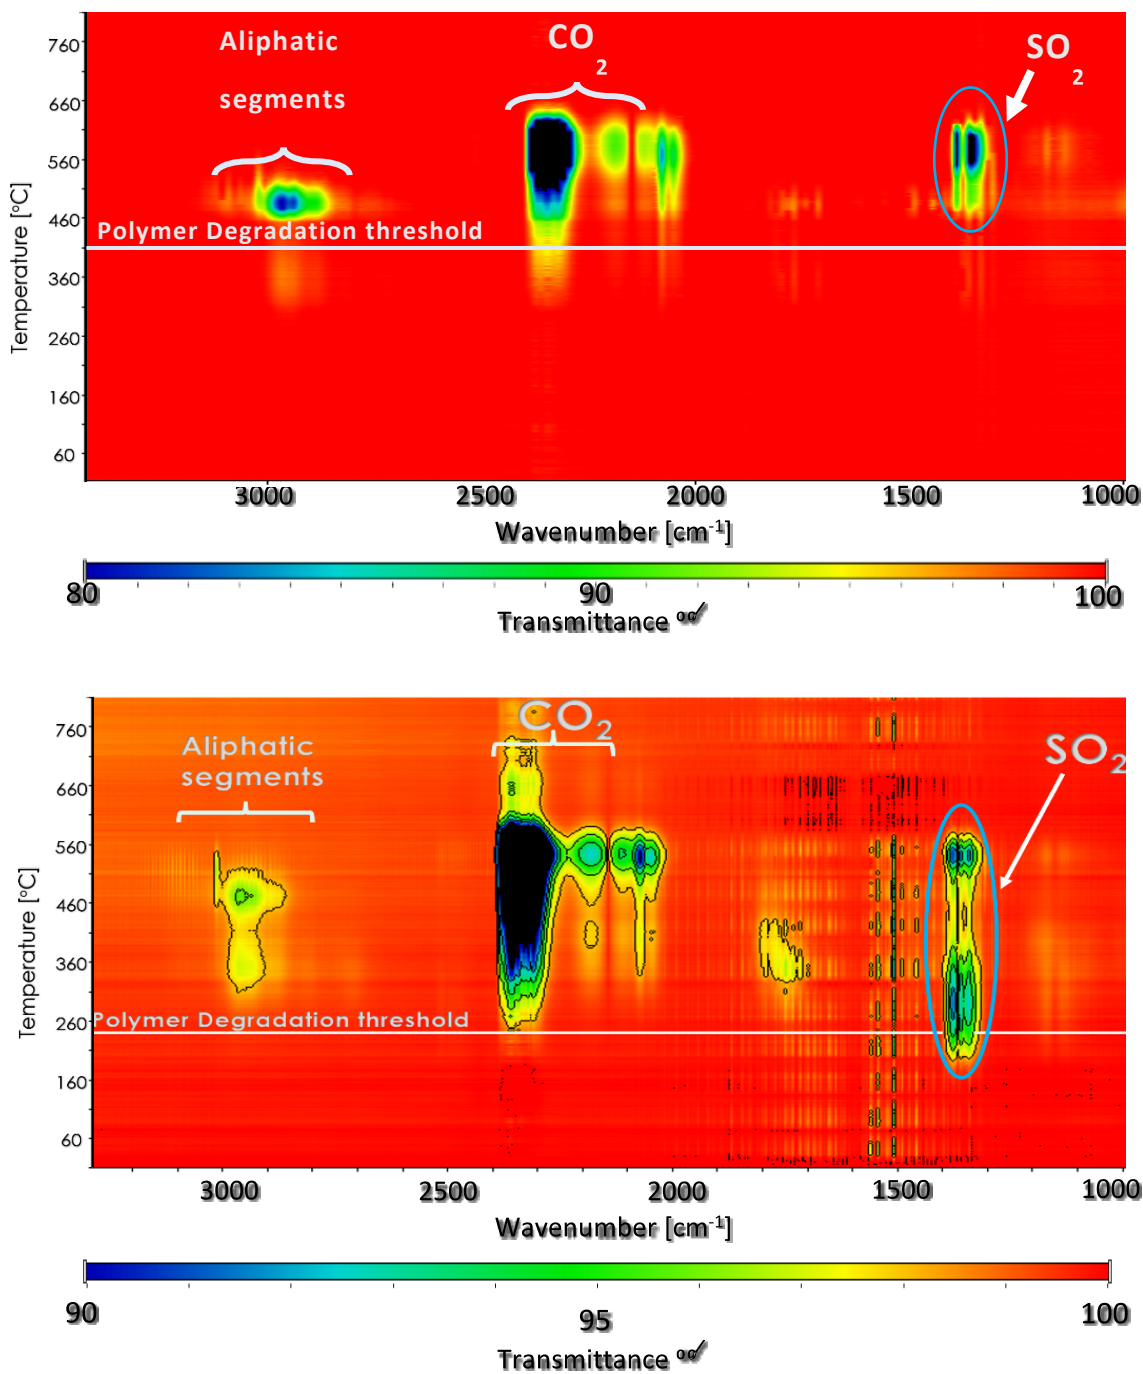

Figure S7 - TGA-IR analysis of TGA gaseous products transmittance as function of temperature at different wavenumbers for (a) P3HT (b) P3HT-TDO.

linking reaction while the second stage corresponds to thermal decomposition of the polymer. Transmittance analysis shows release of SO<sub>2</sub> between 150°C and 420°C in the first stage associated with cross-linking, while release of CO<sub>2</sub> begins only at 250°C. Analysis of P3HT under same conditions shows no significant presence of SO<sub>2</sub> or CO<sub>2</sub> up to 300°C, while release of SO<sub>2</sub> is correlated with release of CO<sub>2</sub> – both due to thermal oxidation and decomposition of polymer structure.

## 6. PCBM crystal formation kinetics

P3HT/P3HT-TDO/PCBM thin films were prepared from 20 mg/ml solution in chlorobenzene (0.5:0.5:1; w/w) with 20 mg/ml P3HT/PCBM films as reference (1:1; w/w). The films were annealed at 170°C, 150°C and 130°C under vacuum for different periods of time.

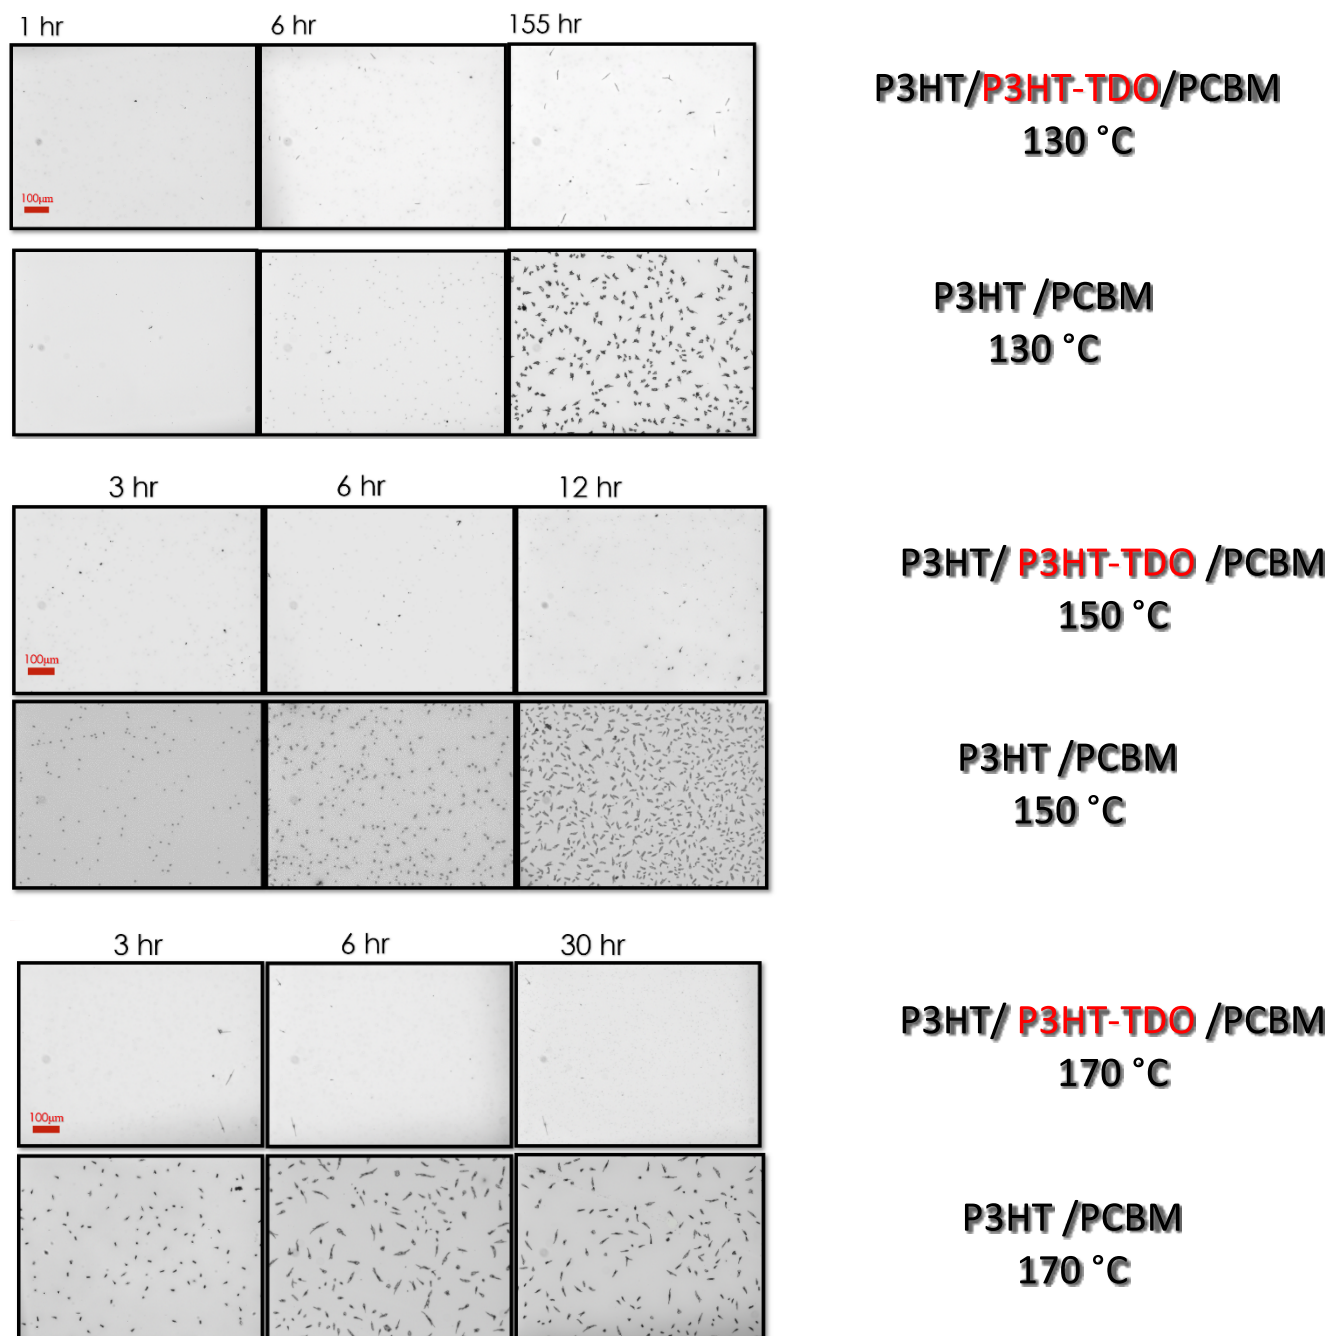

Figure S8 - Microscopy images of thin films of P3HT/PCBM and P3HT/P3HT-TDO/PCBM annealed at different temperatures and periods of time.

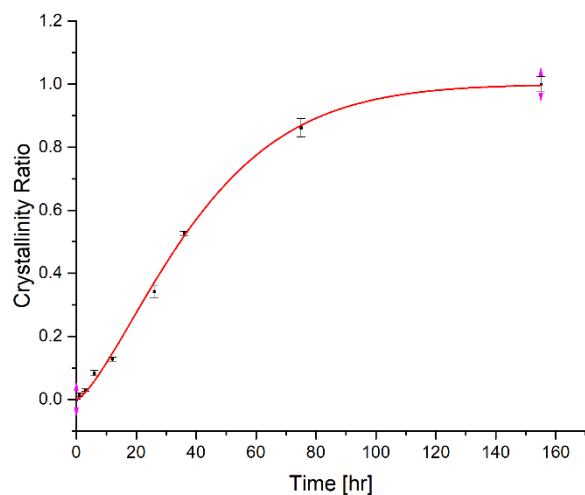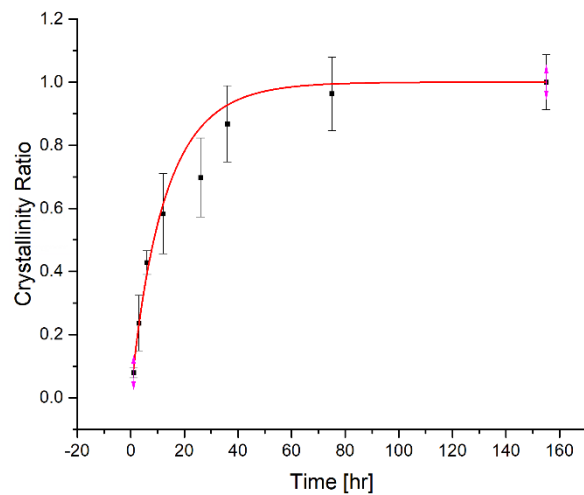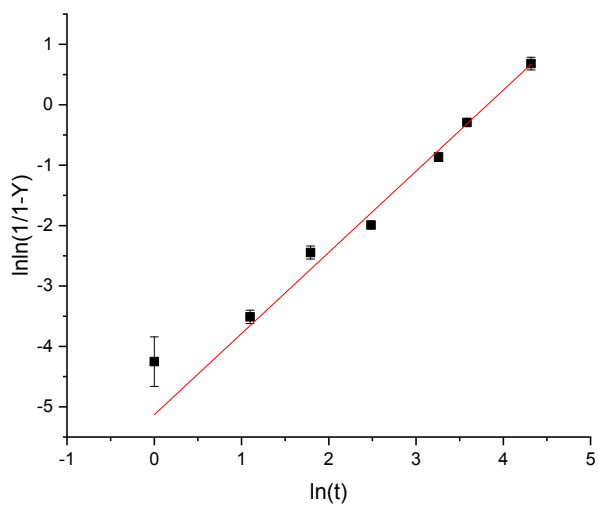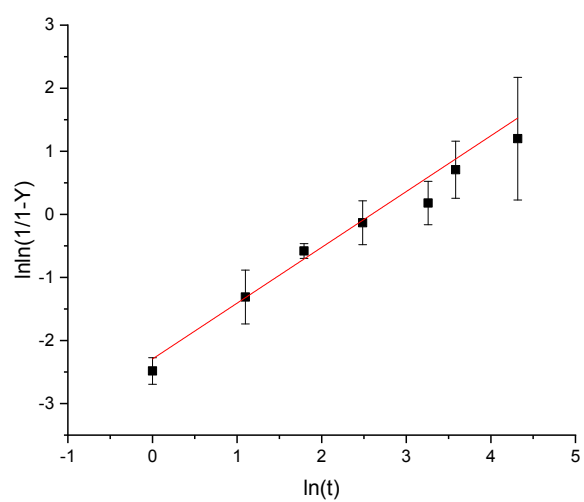

Figure S9. Kinetics of PCBM crystal growth in (a) P3HT/PCBM and (b) P3HT/P3HT-TDO/PCBM annealed at 30°C. Linearized expression of crystal growth for (c) P3HT/PCBM and (d) P3HT/P3HT-TDO/PCBM (parameter Y is crystallinity Ratio).

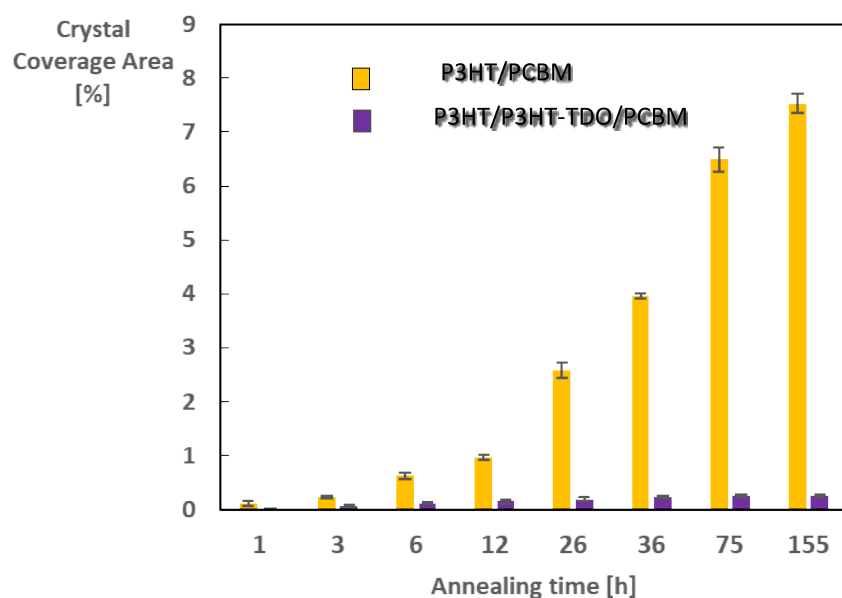

Figure S10 - Percent areas of P3HT/PCBM and P3HT/P3HT-TDO/PCBM thin films covered by PCBM crystals as a function of annealing time at 130 °C calculated based on microscopy images.

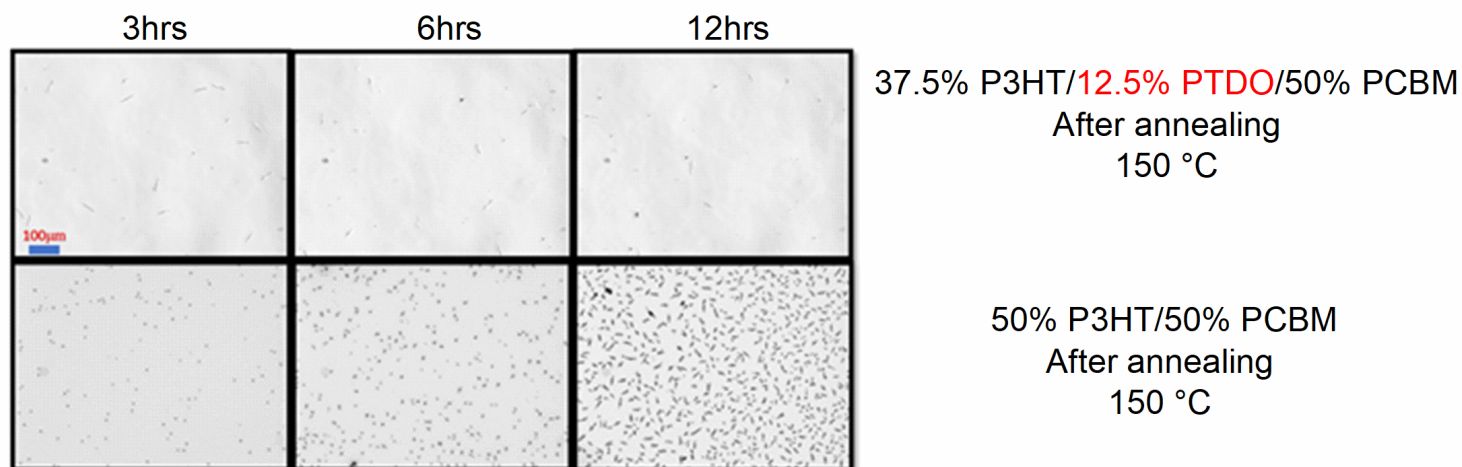

Figure S11 - Microscopy images of thin films of P3HT/PCBM and P3HT/P3HT-TDO/PCBM with 12.5% PTDO, annealed at 150 °C for different periods of time.

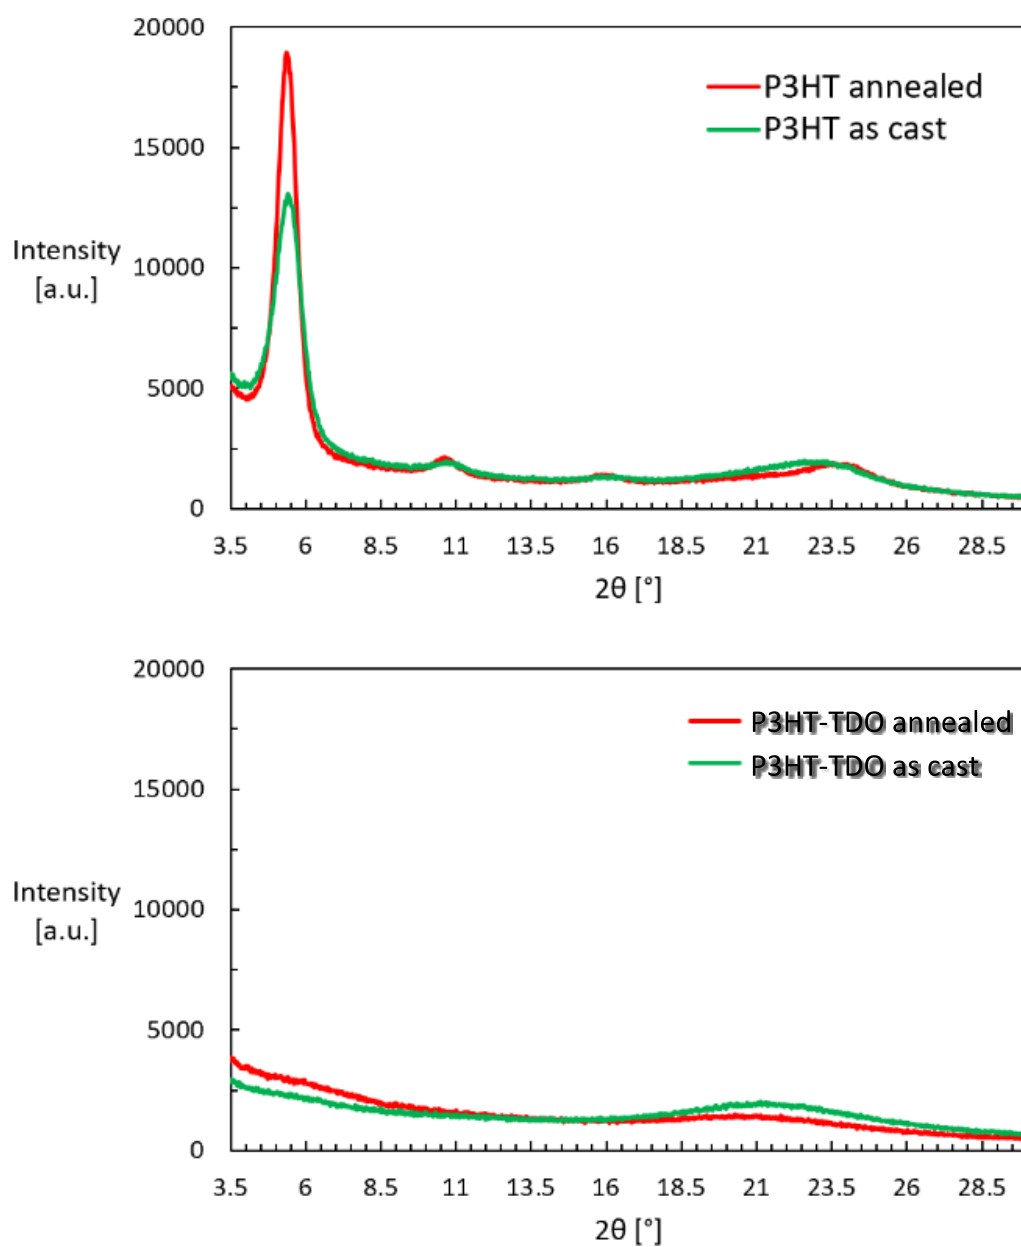

Figure S12- XRD analysis of (a) P3HT and (b)P3HT-TDO thin films as cast and after annealing.
